# Supplementary material
Source: HighWire-hosted journal article supplement (https://cmaj.ca/highwire/filestream/78969/field_highwire_adjunct_files/0/202262-res-1-at.pdf)
Supplement: 202262-res-1-at.pdf [file 202262-res-1-at.pdf]

**Appendix 1. BORN Information System (BIS) variables used to define medical or pre-labour indications for cesarean delivery**

| <b>Medical or pre-labour indications for cesarean delivery</b>                            | <b>Coding</b> |
|-------------------------------------------------------------------------------------------|---------------|
| Fetal \ Anomaly(ies)                                                                      | 1023710       |
| Fetal \ Intrauterine Growth Restriction                                                   | 1023730       |
| Fetal \ Macrosomia                                                                        | 1023740       |
| Maternal \ Gestational hypertension                                                       | 3100157       |
| Maternal \ HIV – Human Immunodeficiency Virus                                             | 1023775       |
| Maternal \ HSV - Herpes Simplex Virus                                                     | 3000123       |
| Maternal \ Hypertensive disorders of pregnancy - Eclampsia                                | 1023780       |
| Maternal \ Hypertensive disorders of pregnancy - HELLP                                    | 1023790       |
| Maternal \ Hypertensive disorders of pregnancy - Preeclampsia                             | 1023800       |
| Maternal \ Maternal Health Conditions/s                                                   | 1023860       |
| Maternal \ Obesity                                                                        | 1023904       |
| Maternal \ Placenta Increta/Accreta/Percreta                                              | 3100159       |
| Maternal \ Placenta previa                                                                | 1023840       |
| Maternal \ Placental abruption                                                            | 1023850       |
| Maternal \ Prelabour Rupture of Membranes (PROM) in women with planned C/Section          | 3000128       |
| Maternal \ Preterm prelabour rupture of membranes (PPROM) in women with planned C/Section | 3000122       |
| Maternal \ Previous T incision/classical incision/uterine surgery                         | 3100158       |
| Maternal \ Previous uterine rupture                                                       | 3000127       |
| Maternal \ Suspected chorioamnionitis                                                     | 1023880       |
| Maternal \ Uterine rupture                                                                | 1023900       |
